# Supplementary material for: Tunable optical property and zero-field splitting of transition metal adatom-graphene quantum dot systems
Source: Royal Society of Chemistry journal article supplement (doi:10.1039/d1tc02545g), 2021-01-01
Supplement: d1tc02545g1.pdf [file d1tc02545g1.pdf]

Supporting information

## Tunable optical property and zero-field splitting of transition metal adatom-graphene quantum dot systems

Do Hyeon Kim, Adem H. Kulahlioglu, Hae Wook Han and Byoung Don Kong\*

**Table S1** Calculated frontier orbital(LUMO+2 ~ HOMO-2) of three different sized TM-GQDs with time dependent density functional theory ZORA and SOC perturbation level methods. All the energy are indicates as absolute values. At the top of table, there are an atom species and basis-set used for it. All units are "eV".

| GQD-27 | Cr<br>[ZORA-DEF2-TZVP] |       |            | Mo<br>[Old-ZORA-TZVP] |       |            | W<br>[SARC-ZORA-TZVP] |       |            | Pd<br>[Old-ZORA-TZVP] |       |            | Pt<br>[SARC-ZORA-TZVP] |       |            | Plain |       |            |
|--------|------------------------|-------|------------|-----------------------|-------|------------|-----------------------|-------|------------|-----------------------|-------|------------|------------------------|-------|------------|-------|-------|------------|
|        | ZORA                   | SOC   | $\Delta E$ | ZORA                  | SOC   | $\Delta E$ | ZORA                  | SOC   | $\Delta E$ | ZORA                  | SOC   | $\Delta E$ | ZORA                   | SOC   | $\Delta E$ | ZORA  | SOC   | $\Delta E$ |
| LUMO+2 | 0.965                  | 0.964 | 0.001      | 1.158                 | 1.176 | 0.018      | 1.236                 | 1.172 | 0.066      | 0.795                 | 0.832 | 0.037      | 0.903                  | 0.891 | 0.012      | 0.422 | 0.425 | 0.003      |
| LUMO+1 | 1.75                   | 1.751 | 0.001      | 1.877                 | 1.921 | 0.044      | 1.989                 | 1.962 | -0.027     | 1.624                 | 1.659 | 0.035      | 1.728                  | 1.718 | 0.01       | 0.91  | 0.913 | 0.003      |
| LUMO   | 1.871                  | 1.805 | 0.066      | 1.966                 | 1.981 | 0.015      | 2.491                 | 2.459 | -0.032     | 1.747                 | 1.793 | 0.046      | 2.652                  | 2.621 | 0.031      | 1.712 | 1.714 | 0.002      |
| HOMO   | 3.957                  | 3.969 | 0.012      | 3.945                 | 3.966 | 0.021      | 3.954                 | 3.939 | 0.015      | 5.027                 | 5.122 | 0.095      | 5.305                  | 5.312 | 0.007      | 5.546 | 5.549 | 0.003      |
| HOMO-1 | 4.379                  | 4.384 | 0.005      | 4.263                 | 4.261 | 0.002      | 4.089                 | 4.090 | 0.001      | 5.114                 | 5.182 | 0.068      | 5.344                  | 5.349 | 0.005      | 6.419 | 6.422 | 0.003      |
| HOMO-2 | 4.685                  | 4.71  | 0.025      | 4.557                 | 4.583 | 0.026      | 4.646                 | 4.634 | 0.012      | 5.231                 | 5.356 | 0.125      | 5.44                   | 5.467 | 0.027      | 7.095 | 7.098 | 0.003      |
| GQD-55 | Cr<br>[ZORA-DEF2-TZVP] |       |            | Mo<br>[Old-ZORA-TZVP] |       |            | W<br>[SARC-ZORA-TZVP] |       |            | Pd<br>[Old-ZORA-TZVP] |       |            | Pt<br>[SARC-ZORA-TZVP] |       |            | Plain |       |            |
|        | ZORA                   | SOC   | $\Delta E$ | ZORA                  | SOC   | $\Delta E$ | ZORA                  | SOC   | $\Delta E$ | ZORA                  | SOC   | $\Delta E$ | ZORA                   | SOC   | $\Delta E$ | ZORA  | SOC   | $\Delta E$ |
| LUMO+2 | 1.707                  | 1.709 | 0.002      | 1.836                 | 1.842 | 0.006      | 1.852                 | 1.832 | 0.02       | 1.349                 | 1.369 | 0.02       | 1.390                  | 1.387 | 0.003      | 1.207 | 1.21  | 0.003      |
| LUMO+1 | 2.099                  | 2.025 | 0.074      | 2.048                 | 2.096 | 0.048      | 2.376                 | 2.367 | 0.007      | 1.865                 | 1.89  | 0.025      | 2.496                  | 2.493 | 0.003      | 1.419 | 1.421 | 0.002      |
| LUMO   | 2.330                  | 2.332 | 0.002      | 2.384                 | 2.39  | 0.006      | 2.764                 | 2.726 | 0.038      | 2.491                 | 2.513 | 0.022      | 2.569                  | 2.55  | 0.019      | 2.621 | 2.623 | 0.002      |
| HOMO   | 4.262                  | 4.271 | 0.009      | 4.233                 | 4.243 | 0.01       | 4.212                 | 4.210 | 0.002      | 4.545                 | 4.579 | 0.034      | 4.789                  | 4.774 | 0.015      | 4.735 | 4.738 | 0.003      |
| HOMO-1 | 4.346                  | 4.352 | 0.006      | 4.443                 | 4.454 | 0.011      | 4.387                 | 4.394 | 0.007      | 5.372                 | 5.441 | 0.069      | 5.440                  | 5.461 | 0.021      | 5.972 | 5.974 | 0.002      |
| HOMO-2 | 4.886                  | 4.887 | 0.001      | 4.566                 | 4.557 | 0.009      | 4.466                 | 4.469 | 0.003      | 5.514                 | 5.562 | 0.048      | 5.563                  | 5.592 | 0.029      | 6.156 | 6.159 | 0.003      |
| GQD-67 | Cr<br>[ZORA-DEF2-TZVP] |       |            | Mo<br>[Old-ZORA-TZVP] |       |            | W<br>[SARC-ZORA-TZVP] |       |            | Pd<br>[Old-ZORA-TZVP] |       |            | Pt<br>[SARC-ZORA-TZVP] |       |            | Plain |       |            |
|        | ZORA                   | SOC   | $\Delta E$ | ZORA                  | SOC   | $\Delta E$ | ZORA                  | SOC   | $\Delta E$ | ZORA                  | SOC   | $\Delta E$ | ZORA                   | SOC   | $\Delta E$ | ZORA  | SOC   | $\Delta E$ |
| LUMO+2 | 1.861                  | 1.864 | 0.003      | 1.97                  | 1.976 | 0.004      | 1.986                 | 1.969 | 0.013      | 1.785                 | 1.801 | 0.016      | 1.807                  | 1.804 | 0.003      | 1.385 | 1.387 | 0.002      |
| LUMO+1 | 2.18                   | 2.103 | 0.077      | 2.107                 | 2.154 | 0.047      | 2.832                 | 2.793 | 0.039      | 1.891                 | 1.919 | 0.028      | 2.659                  | 2.641 | 0.018      | 1.837 | 1.838 | 0.001      |
| LUMO   | 2.983                  | 2.983 | 0          | 3.043                 | 3.05  | 0.007      | 3.052                 | 3.048 | 0.004      | 2.974                 | 2.99  | 0.016      | 3.11                   | 3.099 | 0.012      | 3.04  | 3.042 | 0.002      |
| HOMO   | 4.017                  | 4.024 | 0.007      | 3.957                 | 3.964 | 0.007      | 3.933                 | 3.93  | 0.003      | 4.278                 | 4.295 | 0.017      | 4.285                  | 4.283 | 0.002      | 4.377 | 4.379 | 0.002      |
| HOMO-1 | 4.321                  | 4.326 | 0.005      | 4.433                 | 4.445 | 0.012      | 4.427                 | 4.428 | 0.001      | 5.11                  | 5.156 | 0.046      | 5.276                  | 5.28  | 0.004      | 5.543 | 5.545 | 0.002      |
| HOMO-2 | 4.719                  | 4.723 | 0.004      | 4.64                  | 4.627 | 0.013      | 4.492                 | 4.502 | 0.01       | 5.393                 | 5.438 | 0.045      | 5.467                  | 5.488 | 0.021      | 6.044 | 6.046 | 0.002      |

**Table S2** Comparison between the formal TD-DFT and TDA. ZFS, intersystem-crossing gap and the energy gap between singlet ground state and first triplet excited state of Pt-GQDs, Mo-GQDs and W-GQDs are shown. Open shell structure such as Mo-GQDs and W-GQDs are significantly different compare with TDA results. The energy values of Mo-GQD-67 and all the W-GQDs are unavailable as they turn out to be pure imaginary (indicated as "-"). All units are "eV".

| Open / Close shell | Closed shell molecule |      |                                    |       |      |                                    | Open shell molecule |      |                                    |       |      |                                    |               |     |                                    |       |      |                                    |
|--------------------|-----------------------|------|------------------------------------|-------|------|------------------------------------|---------------------|------|------------------------------------|-------|------|------------------------------------|---------------|-----|------------------------------------|-------|------|------------------------------------|
|                    | Pt-GQD                |      |                                    |       |      |                                    | Mo-GQD              |      |                                    |       |      |                                    | W-GQD         |     |                                    |       |      |                                    |
|                    | Formal TD-DFT         |      |                                    | TDA   |      |                                    | Formal TD-DFT       |      |                                    | TDA   |      |                                    | Formal TD-DFT |     |                                    | TDA   |      |                                    |
|                    | ZFS                   | ISC  | T <sub>1</sub> -S <sub>0</sub> gap | ZFS   | ISC  | T <sub>1</sub> -S <sub>0</sub> gap | ZFS                 | ISC  | T <sub>1</sub> -S <sub>0</sub> gap | ZFS   | ISC  | T <sub>1</sub> -S <sub>0</sub> gap | ZFS           | ISC | T <sub>1</sub> -S <sub>0</sub> gap | ZFS   | ISC  | T <sub>1</sub> -S <sub>0</sub> gap |
| GQD-27             | 0.092                 | 2.14 | 0.51                               | 0.092 | 2.08 | 0.57                               | 0.061               | 1.73 | 0.25                               | 0.015 | 1.54 | 0.44                               | -             | -   | -                                  | 0.026 | 1.44 | 0.016                              |
| GQD-55             | 0.060                 | 1.47 | 0.75                               | 0.063 | 1.41 | 0.81                               | 0.027               | 1.43 | 0.42                               | 0.013 | 1.3  | 0.55                               | -             | -   | -                                  | 0.014 | 1.45 | 0.0001                             |
| GQD-67             | 0.005                 | 0.92 | 0.25                               | 0.003 | 0.77 | 0.40                               | -                   | -    | -                                  | 0.014 | 0.88 | 0.029                              | -             | -   | -                                  | 0.012 | 0.86 | 0.023                              |
